# Supplementary material
Source: Elsevier journal article supplement (https://www.sciencedirect.com/science/article/pii/S0210569116301103)
Supplement: mmc2 [file S0210569116301103:mmc2.doc]

**Additional file 2. Guide for the Behavioural Indicators of Pain Scale (ESCID), Spanish version.**

| **MUSCULATURA FACIAL** | | |
| --- | --- | --- |
| 0 puntos | Relajada | Gesto relajado, expresión tranquila |
| No ceño fruncido, ni dientes/ojos apretados |
| 1 punto | En tensión, ceño fruncido y/o gesto de dolor | Ceño fruncido, tensión ojos/dientes de forma intermitente |
| 2 puntos | Ceño fruncido de forma habitual y/o dientes apretados | Mayoría del tiempo frunciendo ceño y/o apretando ojos/dientes |
| **TRANQUILIDAD** | |  |
| 0 puntos | Tranquilo, relajado, movimientos normales | Relajado, ausencia de movimiento o movimientos normales |
| 1 punto | Movimientos ocasionales de inquietud y/o cambio de posición | Cambio de postura, movimientos de “cabeceo”, movimientos ocasionales dirigidos a puntos probablemente dolorosos (máximo 1 movimiento cada 10 seg.) |
| 2 puntos | Movimientos frecuentes, incluyendo cabeza y/o extremidades | Inquieto, movimientos descritos con episodios de intervalos menores a 10 seg. |
| **TONO MUSCULAR** | | |
| 0 puntos | Normal | Relajado, no tensión ni resistencia a movimientos pasivos |
| 1 punto | Aumentado. Flexión de dedos de manos y/o pies | Tensión muscular y/o contracción de extremidades, flexión de dedos de manos y/o pies. Resistencia a movimientos pasivos: 2-3 sobre 5 |
| 2 puntos | Rígido | Contracción fuerte y permanente de extremidades y dedos. Resistencia a movimientos pasivos: 4-5 sobre 5 |
| **ADAPTACIÓN A LA VENTILACIÓN MECÁNICA** | |  |
| 0 puntos | Tolera la ventilación mecánica | Adaptado a VM. |
| No dispara alarmas |
| 1 punto | Tose, pero tolera la ventilación mecánica | Episodios autolimitados de tos u otras alarmas. |
| No precisan intervención para su resolución |
| 2 puntos | Lucha con el respirador | Intolerancia a VM |
| Alarmas que no cesan, precisa intervención al respecto |
| **CONFORTABILIDAD** | | |
| 0 puntos | Confortable y/o tranquilo | Paciente tranquilo y relajado |
| 1 punto | Se tranquiliza a la voz y/o al tacto | Poco confortable Movimientos y/o agitación, pero se tranquiliza al hablarle y/o tocarle |
| Fácil de distraer |
| 2 puntos | Difícil de confortar al tacto o hablándole | Agitado, poco confortable. No se tranquiliza al interaccionar con él/ella |
